# Supplementary material for: On the evaluation of the fidelity of supervised classifiers in the prediction of chimeric RNAs
Source: Springer Nature journal article supplement (doi:10.1186/s13040-016-0112-6), 2016-11-02
Supplement: MOESM1 [file 13040_2016_112_MOESM1_ESM.pdf]

# Anatomy of a chimeric junction identified with CRAC algorithm

Input data

**Chimeric event**  
Chromosome A and B are translocated together. A chimeric transcript is produced from the fusion of two genes, one from chromosome A and the other from chromosome B.

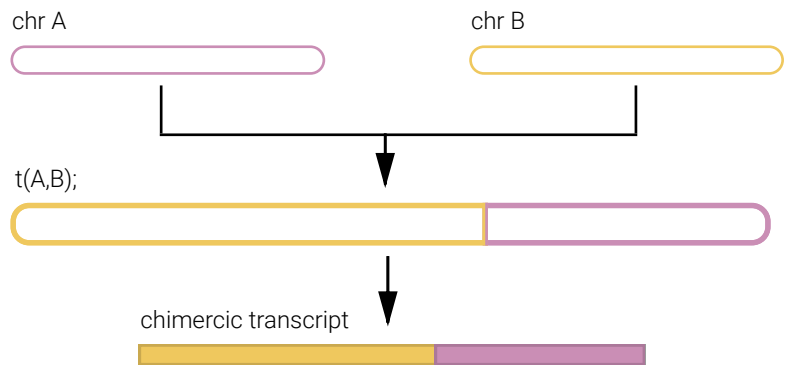

**chimeric read**

A read overlapping the chimeric junction.

ATGCTGTAGG GCTGATCGAC

CRAC algorithm

**CRAC k-mer analysis**  
CRAC procedure to analyse reads relies on the analysis of k-mer profiles.

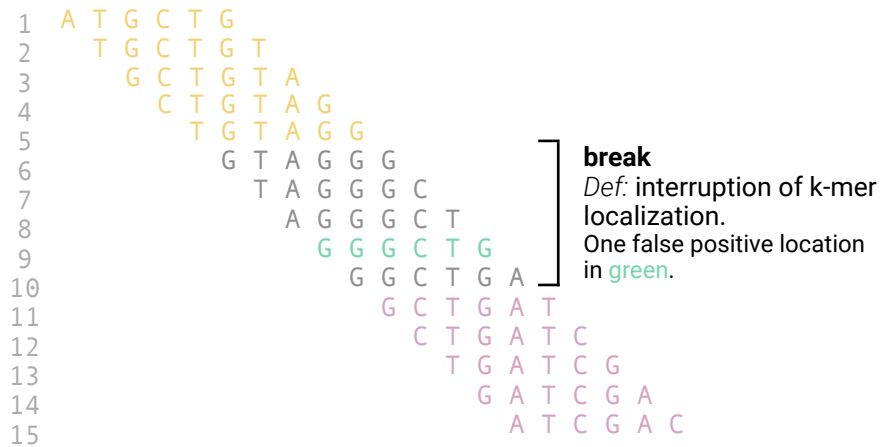

**localization profile**  
Number of time each k-mer is found on the reference genome.

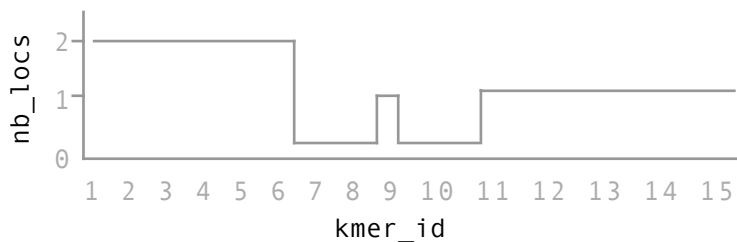

**support profile**  
Number of time each k-mer is found in the input dataset.

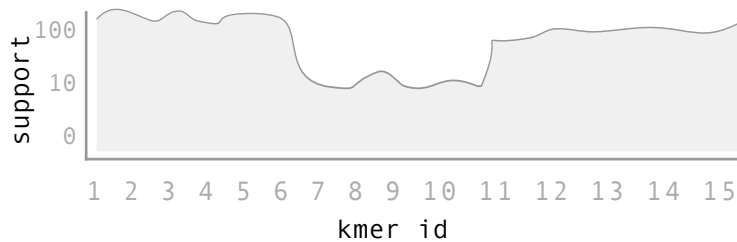

ML features

**score break length**  
Measure of distance between the observed break length and the theoretical break length.

$$\text{score\_break\_length} = \text{observed\_break\_length}() / (k - 1) = 1$$

**score is duplicated**  
If the k-mer location around the break is ambiguous.

**score\_is\_duplicate = true**

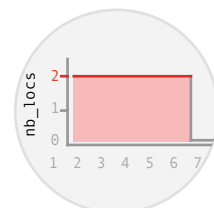

**score coefficient variation**  
Coefficient variation of the support profile.

$$\text{score\_coeff\_var} = \text{std\_dev}(\text{support}[]) / \text{mean}(\text{support}[])$$
